# Supplementary material
Source: publisher figshare collection journal article supplement (https://acs.figshare.com/ndownloader/files/4097737)
Supplement: Supplementary file 1 [file 4097737]

# **A new facile method for preparing $M_3B_7O_{13}I$ boracites ( $M = Mn, Fe, Co, Ni, Cd$ )**

*Xiu-Li Wang,<sup>†,‡</sup> Yi-Zhi Huang,<sup>†</sup> Li-Ming Wu<sup>\*†</sup>*

*State Key Laboratory of Structural Chemistry, Fujian Institute of Research on the Structure of Matter, Chinese Academy of Sciences, Fuzhou, Fujian 350002, People's Republic of China, and Graduate University of Chinese Academy of Sciences, Beijing 100039, People's Republic of China*

To whom correspondence should be addressed. E-mail: [liming\\_wu@fjirsm.ac.cn](mailto:liming_wu@fjirsm.ac.cn). Tel: (011)86-591-83705401.

<sup>†</sup> Chinese Academy of Sciences.

<sup>‡</sup> Graduate University of Chinese Academy of Sciences

## **1. Experimental Section**

All reactants were used without further purification. The purities of the starting oxides were checked by powder X-ray diffraction data. Amorphous boron powder (95–97%, Dan Dong Chemical Industry), Iodine (>99.8%, Shanghai Shi Yi Chemical Reagent CO., Ltd),  $B_2O_3$  (98.0%),  $MnO$  (99.5%),  $Mn_3O_4$  (>98.6%),  $Fe_3O_4$  (97%),  $CoO$  (99.99%) and  $NiO$  were purchased from Aladdin Chemistry CO.,Ltd,  $Fe_2O_3$  (>99.8%, Tianjin Fu Chen chemical reagent works),  $Co_3O_4$  (99%, Shanghai Reagent General factory),  $CdO$  (99.95%, 325 mesh, Alfa Aesar China (Tianjin) Co., Ltd.).

In brief, the reported approach is a two crucible method, i.e., two silica crucibles were placed into a silica tubing, the top one contains stoichiometric metal oxide,  $B_2O_3$ , which were mixed and ground for 3 minutes in a mortar before loading. The bottom one contains stoichiometric element B, and  $I_2$ , which were mixed and ground for 3 minutes in a mortar before loading. The reaction assembly was flame sealed under vacuum and then heated in a furnace to the designated reaction temperature in 2 h, dwelled there for 3 days, and then cooled to the room temperature by switching off furnace.

In a typical experiment, MnO (255 mg, 3.6 mmol),  $B_2O_3$  (278 mg, 4.0 mmol), elemental B (8 mg, 0.8 mmol) and  $I_2$  (167 mg, 0.66 mmol) were weighed and loaded. Extra amount of B and  $I_2$  according to the stoichiometry (reaction 1, Table 1) were loading to ensure the complete reaction. The assembly was heated to 450 °C for 3 days. After the reaction, the excess B and  $I_2$  remained in the bottom crucible, no corrosion on the inner surface of the crucibles as well as the silica jacket was found. The products were crushed and ground in a mortar and washed with ethanol several times to remove the unreacted  $I_2$ , B. The experimental conditions and some details for M = Mn, Fe, Co, Ni, Cd were summarized in Table 1.

For comparison, a reaction without loading B was carried out. MnO (255 mg, 3.6 mmol),  $B_2O_3$  (278 mg, 4.0 mmol) and  $I_2$  (167 mg, 0.66 mmol) were loaded, and heated according to the corresponding profiles, i.e., 450 °C and 600 °C for 3 days, the products were mainly  $Mn(BO_2)_2$ , together with  $I_2O_4$ , desired boracite was not formed at all. (Fig. S6)

**Powder X-ray Diffraction:** X-ray powder diffraction data were recorded on a Rigaku D/MiniFlex II diffractometer at 15 kV, 30 mA for Cu  $K\alpha$ . Data were collected in

the range  $2\theta = 5-75^\circ$  with scan step of  $0.02^\circ$ . The cell parameters of  $M_3B_7O_{13}I$  were obtained by the cell refinement with the aid of JADE 5.0 software package.

Table S1 Cell parameters (Å) calculated from the XRD patterns of  $M_3B_7O_{13}I$  (M = Mn, Fe, Co, Ni, Cd)

| reaction | formula          | experimental                                          | ref                                                                      |
|----------|------------------|-------------------------------------------------------|--------------------------------------------------------------------------|
| 1        | $Mn_3B_7O_{13}I$ | $a = 12.326(3)$                                       | $a = 12.3404(3)^1$                                                       |
| 2        | $Fe_3B_7O_{13}I$ | $a = 12.2589(6)$                                      | $a = 12.22869(2)^2$                                                      |
| 3        | $Co_3B_7O_{13}I$ | $a = 12.093(4)$                                       | $a = 12.110(1)^3$                                                        |
| 4        | $Ni_3B_7O_{13}I$ | $a = 11.998(5)$                                       | $a = 12.0368(8)^4$                                                       |
| 5        | $Cd_3B_7O_{13}I$ | $a = 8.868(3),$<br>$b = 8.874(2),$<br>$c = 12.507(4)$ | $a = 8.890,$<br>$b = 8.890,$<br>$c = 12.530$ (JCPDS PDF-2 No: = 26-0247) |
| 6        | $Mn_3B_7O_{13}I$ | $a = 12.365(2)$                                       | $a = 12.3404(3)^1$                                                       |
| 7        | $Fe_3B_7O_{13}I$ | $a = 12.205(3)$                                       | $a = 12.22869(2)^2$                                                      |
| 8        | $Co_3B_7O_{13}I$ | $a = 12.110(3)$                                       | $a = 12.110(1)^3$                                                        |
| 10       | $Mn_3B_7O_{13}I$ | $a = 12.331(2)$                                       | $a = 12.3404(3)^1$                                                       |
| 11       | $Mn_3B_7O_{13}I$ | $a = 12.363(3)$                                       | $a = 12.3404(3)^1$                                                       |
| 13       | $Mn_3B_7O_{13}I$ | $a = 12.364(1)$                                       | $a = 12.3404(3)^1$                                                       |
| 14       | $Mn_3B_7O_{13}I$ | $a = 12.338(1)$                                       | $a = 12.3404(3)^1$                                                       |
| 15       | $Mn_3B_7O_{13}I$ | $a = 12.336(1)$                                       | $a = 12.3404(3)^1$                                                       |

1. Crottaz, O.; Kubel, F.; Schmid, H. *J. Solid State Chem.*, **1995**, *120*, 60.
2. Kubel, F. *Ferroelectrics.*, **1994**, *160*, 61.
3. Becker, W. J.; Will, G. Z. *Kristallogr.*, **1970**, *131*, 139.
4. Saifuddinov, V. Z.; Bugakov, V. I.; Pakhomov, V. I. *Inorg. Mater.*, **1980**, *16*, 112.
5. Oconnor, C. J. *Prog. Inorg. Chem.* **1982**, *29*, 203.

**Scanning Electron Microscope:** The SEM images were obtained by using a JSM 6700F scanning electron microscope equipped with a field emission gun operating at 10 kV.

**Magnetic Susceptibility:** The DC (direct current) magnetic susceptibility of  $\text{Mn}_3\text{B}_7\text{O}_{13}\text{I}$  was measured on a Quantum Design MPMS-XL magnetometer in the temperature range of 2–300 K. The as-synthesized polycrystalline sample was ground to a fine powder to minimize possible anisotropic effects and loaded into a gelatin capsule. The data were corrected for the susceptibility of the container and for the diamagnetic contribution from the ion core.

The susceptibility data were fit by a least-squares method to the Curie-Weiss equation  $\chi_M = C/(T - q)$ , where  $\chi_M$  is the magnetic susceptibility,  $C$  is the Curie constant, and  $q$  is the Weiss constant. The effective magnetic moment ( $\mu_{\text{eff}}$ ) was calculated from the equation  $\mu_{\text{eff}} = (7.997C)^{1/2} \mu_B$ .<sup>5</sup>

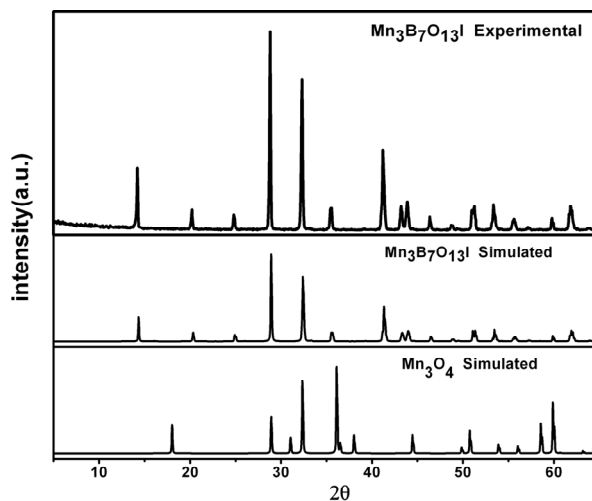

Fig. S1 X-ray powder diffraction patterns of the products of reaction **6** from  $\text{Mn}_3\text{O}_4$ . The pattern match well with the simulated powder pattern of  $\text{Mn}_3\text{B}_7\text{O}_{13}\text{I}$  and does not show any reflection peak from either the starting  $\text{Mn}_3\text{O}_4$  or other possible impurities.

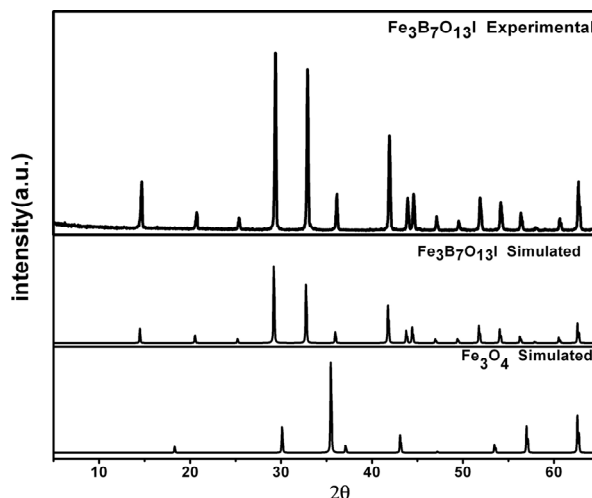

Fig. S2 X-ray powder diffraction patterns of the products of reaction **7** from  $\text{Fe}_3\text{O}_4$ . The pattern mach well with the simulated powder pattern of  $\text{Fe}_3\text{B}_7\text{O}_{13}\text{I}$  and does not show any reflection peak from either the starting  $\text{Fe}_3\text{O}_4$  or other possible impurities.

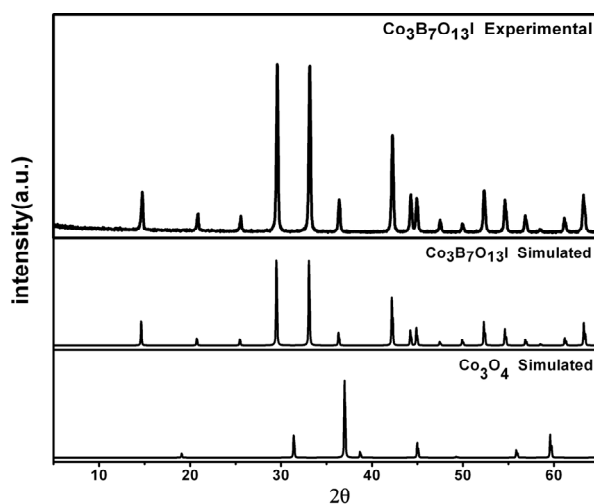

Fig. S3 X-ray powder diffraction patterns of the products of reaction **8** from Co<sub>3</sub>O<sub>4</sub>. The pattern match well with the simulated powder pattern of Co<sub>3</sub>B<sub>7</sub>O<sub>13</sub>I and does not show any reflection peak from either the starting Co<sub>3</sub>O<sub>4</sub> or other possible impurities.

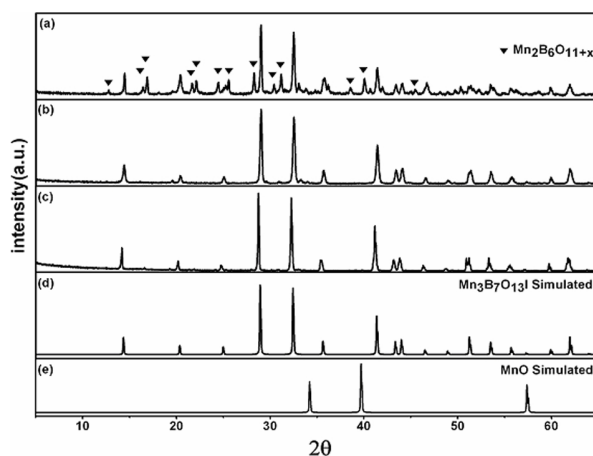

Fig. S4 X-ray powder diffraction patterns of the products of reactions of MnO at different temperatures for 3 days. (a): **9**, 400°C; (b): **10**, 500°C; (c): **11**, 600°C. Reaction **9** generates a mixture of Mn<sub>3</sub>B<sub>7</sub>O<sub>13</sub>I and Mn<sub>2</sub>B<sub>6</sub>O<sub>11+x</sub>. **10** and **11** produce single phased Mn<sub>3</sub>B<sub>7</sub>O<sub>13</sub>I. In these three products, no starting MnO has been observed.

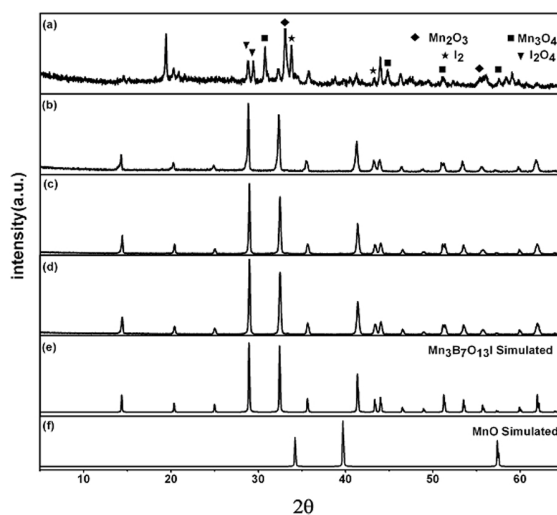

Fig. S5 X-ray powder diffraction patterns of the products of reactions of MnO at different temperatures for 1 days. (a): 12, 600°C; (b): 13, 650°C; (c): 14, 700°C; (d): 15, 750°C. Reaction 13–15 generates single phased  $\text{Mn}_3\text{B}_7\text{O}_{13}\text{I}$  and no starting MnO has been observed. 12 only products are the mixture of  $\text{Mn}_2\text{O}_3$ ,  $\text{Mn}_3\text{O}_4$ ,  $\text{I}_2$  and  $\text{I}_2\text{O}_4$ .

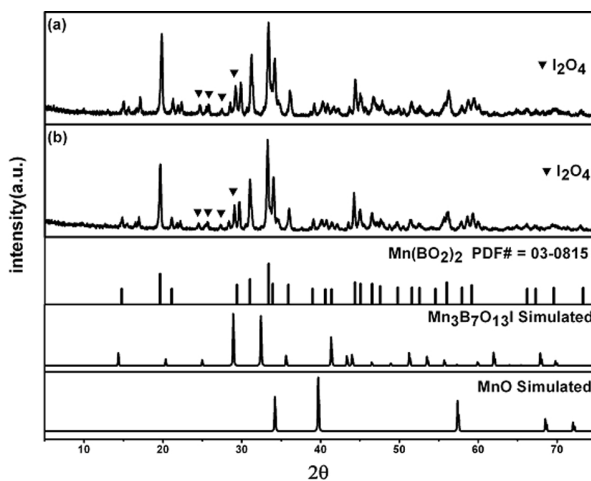

Fig. S6 X-ray powder diffraction patterns of the products of reactions of MnO without B loaded: (a): 16, 450°C, 3d; (b): 17, 600°C, 3d. The products are 80% of  $\text{Mn}(\text{BO}_2)_2$  together with 20% of  $\text{I}_2\text{O}_4$ . No targeting  $\text{Mn}_3\text{B}_7\text{O}_{13}\text{I}$  has been observed.

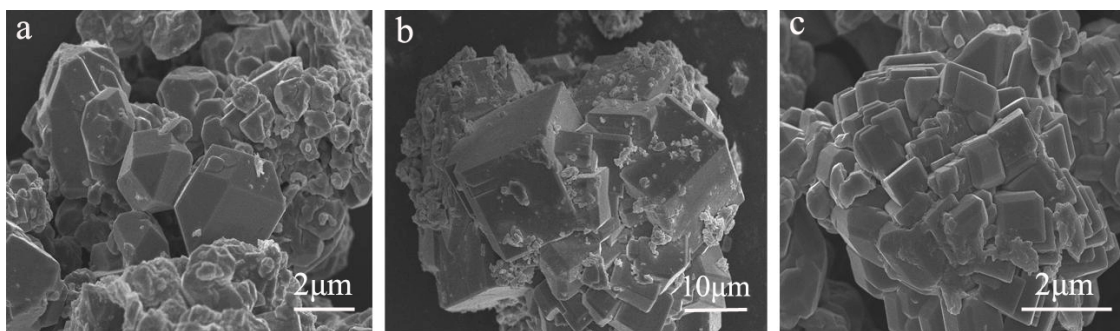

Fig. S7. SEM images of  $\text{Mn}_3\text{B}_7\text{O}_{13}\text{I}$  from the reactions: (a) **1**, 450 °C, 3d; (b) **10**, 500 °C, 3d; (c) **11**, 600 °C, 3d.

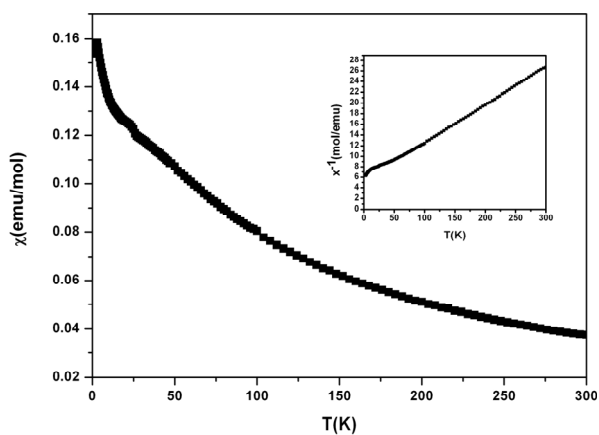

Fig. S8. Magnetic susceptibility of  $\text{Mn}_3\text{B}_7\text{O}_{13}\text{I}$  obtained by reaction **1** plotted against temperature between 2 K and 300K. Inset: Inverse magnetic susceptibility dependence of the temperature.



Table S1. The yields relative to the metal oxide loaded of reactions producing pure phased  $M_3B_7O_{13}I$  after washing by distilled water and ethanol that are listed in Table 1.

|                 |           |           |           |           |           |
|-----------------|-----------|-----------|-----------|-----------|-----------|
| <b>reaction</b> | <b>1</b>  | <b>2</b>  | <b>3</b>  | <b>4</b>  | <b>5</b>  |
| yield           | 82.45%    | 76.63%    | 82.35%    | 76.04%    | 76.55%    |
| <b>reaction</b> | <b>6</b>  | <b>7</b>  | <b>8</b>  |           |           |
| yield           | 73.08     | 76.43%    | 81.73%    |           |           |
| <b>reaction</b> | <b>10</b> | <b>11</b> | <b>13</b> | <b>14</b> | <b>15</b> |
| yield           | 75.53%    | 70.7%     | 87.12%    | 95.21%    | 77.8%     |
